# Supplementary material for: PhcA and PhcR Regulate Ralsolamycin Biosynthesis Oppositely in Ralstonia solanacearum
Source: Front Plant Sci. 2022 May 27;13:903310. doi: 10.3389/fpls.2022.903310 (PMC9197120; doi:10.3389/fpls.2022.903310)
Supplement: Supplementary Table S2 — Ct data of rmyA and rmyB genes in wide type strain EP1, phcA deletion mutant (ΔphcA) and complementary strain ΔphcA(phcA), cell density is OD600 = 1.0. [file Table_2.XLSX]

## Sheet: Sheet1
SI Table 2 Ct data of rmy genes in EP1, ΔphcA and ΔphcA(phcA) (OD600=1.0)
EP1	16S rDNA	rmyA	rmyB
	14.89	22.94	19.84
	14.87	22.77	19.76
	14.87	22.74	19.76
ΔphcA	16S rDNA	rmyA	rmyB
	20.3	35	30.67
	20.34	34.41	30.76
	20.44	35	30.77
ΔphcA(phcA)	16S rDNA	rmyA	rmyB
	16.3	24.11	21.67
	16.24	24.41	21.76
	16.28	24.35	21.66
